# Supplementary material for: Human Neutrophil Clearance of Bacterial Pathogens Triggers Anti-Microbial γδ T Cell Responses in Early Infection
Source: PubMed Central journal article supplement (PMC3093373; doi:10.1371/journal.ppat.1002040), 2011-05-12
Supplement: ppat.1002040.s001.pdf [file ppat.1002040.s001.pdf]

**Text S1: Supporting Information****Table S1.** Bacteria strains used in the present study.

| Strain                                                         | Relevant feature                                                | Gram | HMB-PP | Fosmidomycin MIC ( $\mu\text{g/ml}$ ) |
|----------------------------------------------------------------|-----------------------------------------------------------------|------|--------|---------------------------------------|
| <i>Escherichia coli</i>                                        | [Clontech, Cambridge, UK]                                       |      |        |                                       |
| <i>E. coli</i> wt                                              | Parental laboratory strain BL21                                 | –    | +      | ND                                    |
| <i>E. coli-gfp</i> <sup>+</sup>                                | BL21 expressing GFP (pAcGFP)                                    | –    | +      | ND                                    |
| <i>Mycobacterium smegmatis</i>                                 | [ref. 34]                                                       |      |        |                                       |
| <i>M. smegmatis</i> wt                                         | Parental laboratory strain mc <sup>2</sup> 155                  | +    | +      | ND                                    |
| <i>M. smegmatis-gfp</i> <sup>+</sup>                           | mc <sup>2</sup> 155 expressing GFP (pFLAME7)                    | +    | +      | ND                                    |
| <i>M. smegmatis-gcpE</i> <sup>+</sup>                          | mc <sup>2</sup> 155 expressing GcpE from <i>M. tuberculosis</i> | +    | +++    | ND                                    |
| <i>Listeria innocua</i>                                        | [refs. 35,36]                                                   |      |        |                                       |
| <i>L. innocua</i> wt                                           | Parental laboratory strain APC                                  | +    | –      | ND                                    |
| <i>L. innocua-gfp</i> <sup>+</sup>                             | APC expressing GFP                                              | +    | –      | ND                                    |
| <i>L. innocua-gcpE</i> <sup>+</sup>                            | APC expressing GcpE from <i>Bacillus subtilis</i>               | +    | +++    | ND                                    |
| <i>L. innocua-gcpE</i> <sup>+</sup> / <i>lytB</i> <sup>+</sup> | APC expressing GcpE, LytB from <i>B. subtilis</i>               | +    | +      | ND                                    |
| <b>Clinical isolates</b>                                       | [this study]                                                    |      |        |                                       |
| <i>Acinetobacter baumannii</i>                                 | Strain 48-694D                                                  | –    | +      | > 128                                 |
| <i>Chryseobacterium indologenes</i>                            | Strain S281                                                     | –    | –      | > 128                                 |
| <i>Enterobacter cloacae</i> ‘A’                                | Strain 48-12346                                                 | –    | +      | 1                                     |
| <i>Enterobacter cloacae</i> ‘B’                                | Strain 69-7329                                                  | –    | +      | 1                                     |
| <i>Enterococcus faecalis</i>                                   | Strain IQA 7/09                                                 | +    | –      | > 128                                 |
| <i>Klebsiella pneumoniae</i>                                   | Strain WCH7                                                     | –    | +      | 32                                    |
| <i>Pseudomonas aeruginosa</i>                                  | Strain 75-3755A                                                 | –    | +      | 8                                     |
| <i>Staphylococcus aureus</i>                                   | Strain S288                                                     | +    | –      | > 128                                 |

ND, not determined

**Table S2.** Characteristics of all patients analyzed in the present study.

|                                                                       | <i>Stable</i>      | <i>Acute peritonitis</i> |                     |                     |
|-----------------------------------------------------------------------|--------------------|--------------------------|---------------------|---------------------|
|                                                                       | Cardiff (UK)       | Cardiff (UK)             | Stoke-on-Trent (UK) | ANZDATA (Australia) |
| Total number                                                          | 8                  | 39                       | 385                 | 2,424               |
| Study period                                                          | 2008-2010          | 2008-2010                | 1987-2008           | 2003-2008           |
| Age (mean $\pm$ SD)                                                   | 61.4 $\pm$ 19.5    | 66.3 $\pm$ 11.3          | 57.0 $\pm$ 16.0     | 58.4 $\pm$ 16.7     |
| Women (%)                                                             | 37.5               | 35.9                     | 43.1                | 44.8                |
| Days on PD (mean $\pm$ SD)                                            | 1088.5 $\pm$ 936.2 | 1106.1 $\pm$ 984.9       | 532.0 $\pm$ 581.9   | 738.7 $\pm$ 502.5   |
| 14 <sup>th</sup> day mortality (%)                                    | –                  | 2.6                      | 3.6                 | 1.2                 |
| 14 <sup>th</sup> day technique failure (%)                            | –                  | 12.5                     | 9.6                 | 13.4                |
| 90 <sup>th</sup> day mortality (%)                                    | –                  | 10.3                     | 8.8                 | 1.8                 |
| 90 <sup>th</sup> day technique failure (%)                            | –                  | 28.2                     | 19.0                | 16.8                |
| Culture-positive infections (%)                                       | –                  | 64.1                     | 61.5                | 85.8                |
| HMB-PP <sup>+</sup> organisms among positively identified species (%) | –                  | 50.0                     | 26.4                | 38.6                |

**Table S3.** Odds ratios for risk of technique failure and mortality within 90 days after infection, depending on the causative pathogen.

| <i>90<sup>th</sup> day technique failure</i> | Stoke-on-Trent (UK) | <i>p</i> value | ANZDATA (Australia) | <i>p</i> value | ANZDATA + Stoke-on-Trent combined | <i>p</i> value |
|----------------------------------------------|---------------------|----------------|---------------------|----------------|-----------------------------------|----------------|
| <b>Reference: culture-negative</b>           | <b>1.0</b>          |                | <b>1.0</b>          |                | <b>1.0</b>                        |                |
| HMB-PP <sup>-</sup>                          | 2.0                 | *              | 0.8                 | <i>n.s.</i>    | 1.0                               | <i>n.s.</i>    |
| HMB-PP <sup>+</sup>                          | 7.4                 | ***            | 3.4                 | ***            | 4.1                               | ***            |
| <b>Reference: HMB-PP<sup>-</sup></b>         | <b>1.0</b>          |                | <b>1.0</b>          |                | <b>1.0</b>                        |                |
| Gram <sup>+</sup> HMB-PP <sup>+</sup>        | 3.1                 | <i>n.s.</i>    | 2.0                 | 0.066          | 2.1                               | *              |
| Gram <sup>-</sup> HMB-PP <sup>+</sup>        | 3.8                 | ***            | 4.3                 | **             | 4.0                               | ***            |
| <i>90<sup>th</sup> day mortality</i>         |                     |                |                     |                |                                   |                |
| <b>Reference: culture-negative</b>           | <b>1.0</b>          |                | <b>1.0</b>          |                | <b>1.0</b>                        |                |
| HMB-PP <sup>-</sup>                          | 2.1                 | <i>n.s.</i>    | 2.3                 | <i>n.s.</i>    | 1.3                               | <i>n.s.</i>    |
| HMB-PP <sup>+</sup>                          | 6.3                 | ***            | 5.4                 | *              | 2.8                               | **             |
| <b>Reference: HMB-PP<sup>-</sup></b>         | <b>1.0</b>          |                | <b>1.0</b>          |                | <b>1.0</b>                        |                |
| Gram <sup>+</sup> HMB-PP <sup>+</sup>        | 2.9                 | <i>n.s.</i>    | 2.8                 | <i>n.s.</i>    | 2.4                               | <i>n.s.</i>    |
| Gram <sup>-</sup> HMB-PP <sup>+</sup>        | 3.0                 | *              | 2.4                 | **             | 2.2                               | **             |

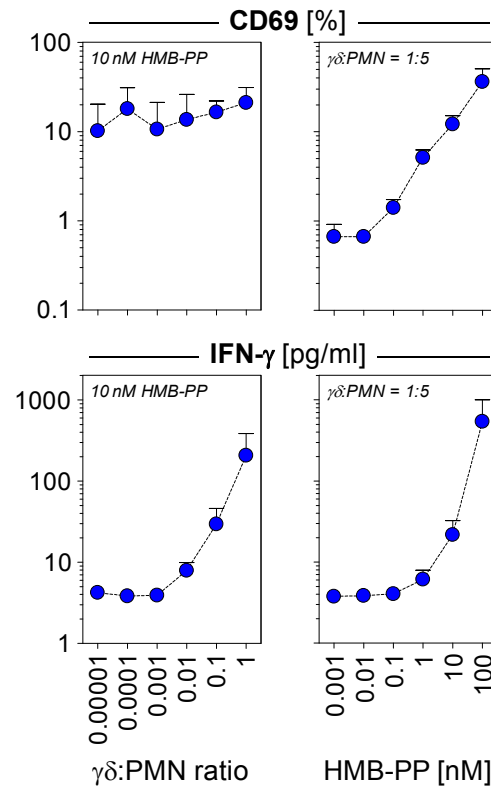

**Figure S1. Activation of  $\gamma\delta$  T cells and dose-dependent secretion of IFN- $\gamma$  in neutrophil- $\gamma\delta$  T cell co-cultures.** Expression of CD69 by  $V\gamma 9^+$   $CD3^+$  T cells was determined after 20 hours in culture by flow cytometry; supernatants were analyzed after 20 hours by ELISA. Data shown are mean values + SEM from independent experiments using three different donors.

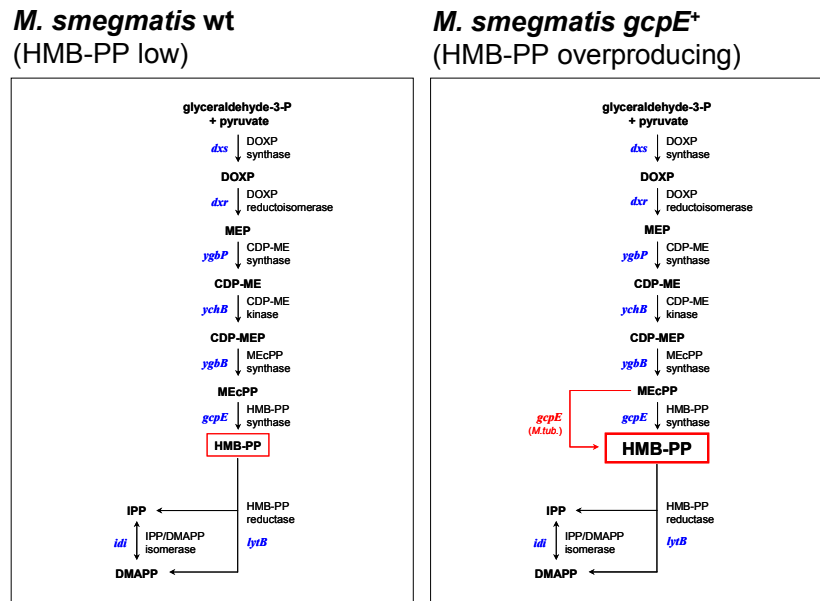

**Figure S2. Isoprenoid biosynthesis in the *Mycobacterium* strains used in the present study.** *M. smegmatis* possess a fully functional non-mevalonate pathway and hence is capable of producing HMB-PP. Transfection of *M. smegmatis* with an additional copy of *gcpE* from *M. tuberculosis* leads to a 2-3 fold accumulation of HMB-PP compared to the wildtype [35].

**Abbreviations:** CDP-ME, 4-diphosphocytidyl-2-C-methyl-D-erythritol; CDP-MEP, 4-diphosphocytidyl-2-C-methyl-D-erythritol 2-phosphate; DMAPP, dimethylallyl pyrophosphate; DOXP, 1-deoxy-D-xylulose 5-phosphate; HMB-PP, (*E*)-4-hydroxy-3-methyl-but-2-enyl pyrophosphate; IPP, isopentenyl pyrophosphate; MEcPP, 2-C-methyl-D-erythritol 2,4-cyclopyrophosphate; MEP, 2-C-methyl-D-erythritol 4-phosphate.

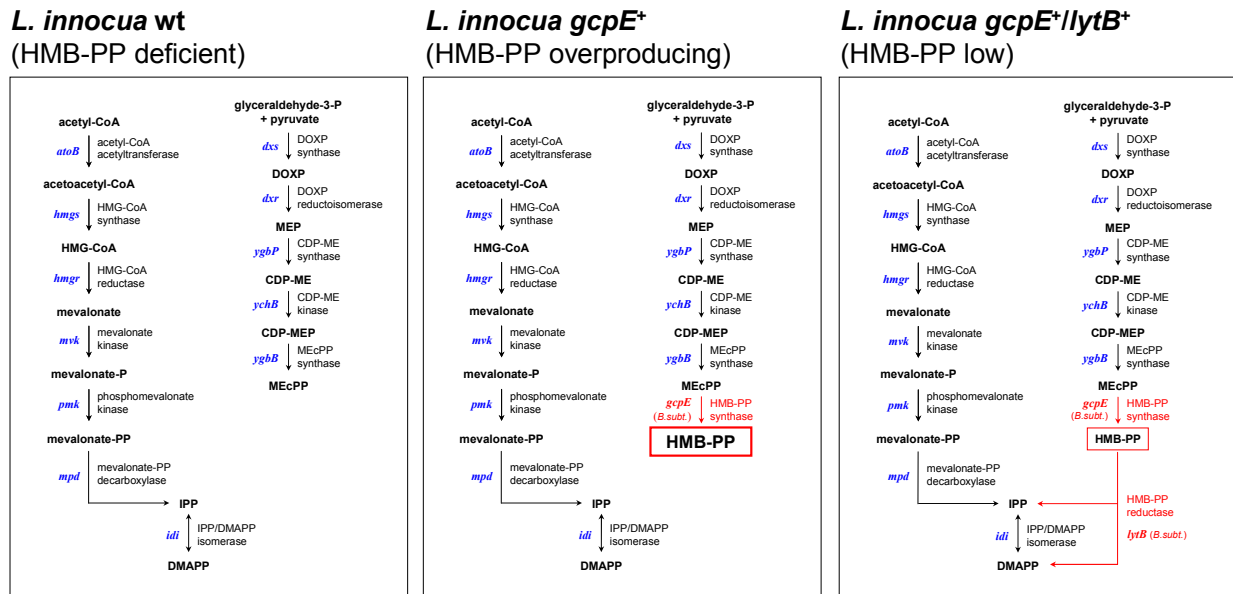

**Figure S3. Isoprenoid biosynthesis in the *Listeria* strains used in the present study.** *L. innocua* utilizes the mevalonate pathway (left) but also possesses a rudimentary non-mevalonate pathway (right) leading to the production of MEcPP but not of HMB-PP. Transfection of the wildtype strain with a copy of the *gcpE* (*ispG*) gene from *Bacillus subtilis* confers the ability to produce and accumulate HMB-PP; co-transfection of *L. innocua gcpE+* with the *lytB* (*ispH*) gene from *B. subtilis* rescues the non-mevalonate pathway in *L. innocua* and leads to intermediate HMB-PP levels due to reduction of HMB-PP into IPP and DMAPP [36,37].

**Abbreviations:** CDP-ME, 4-diphosphocytidyl-2-C-methyl-D-erythritol; CDP-MEP, 4-diphosphocytidyl-2-C-methyl-D-erythritol 2-phosphate; DMAPP, dimethylallyl pyrophosphate; DOXP, 1-deoxy-D-xylulose 5-phosphate; HMB-PP, (*E*)-4-hydroxy-3-methyl-but-2-enyl pyrophosphate; HMG-CoA, 3-hydroxy-3-methylglutaryl-coenzyme A; IPP, isopentenyl pyrophosphate; MEcPP, 2-C-methyl-D-erythritol 2,4-cyclopyrophosphate; MEP, 2-C-methyl-D-erythritol 4-phosphate; P, phosphate.

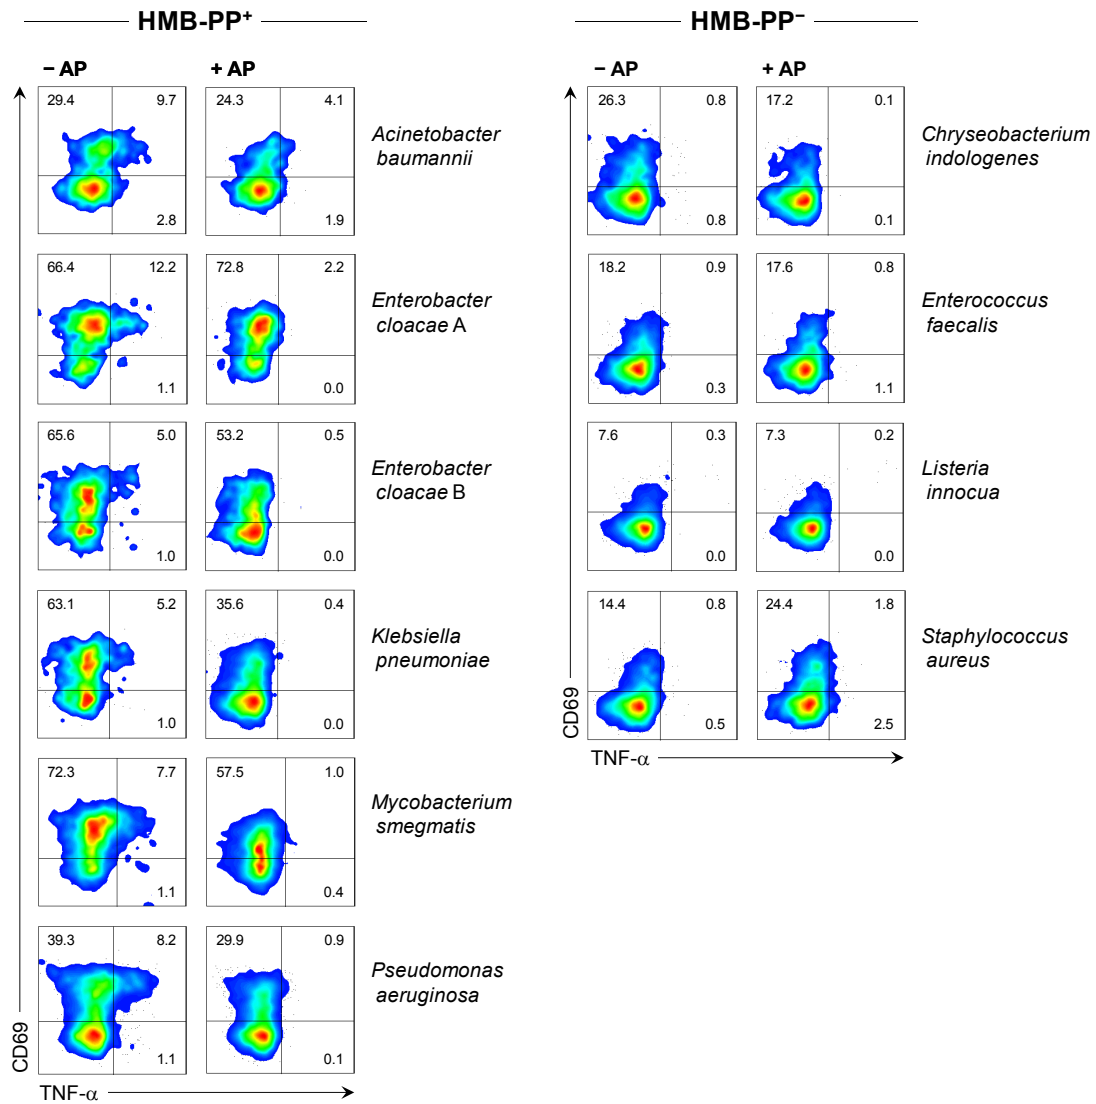

**Figure S4.  $V\gamma 9/V\delta 2$  T cells respond to alkaline phosphatase-sensitive molecules released by phagocytosed HMB-PP producing bacteria.** Activation of  $\gamma\delta$  T cells by neutrophils harboring a range of different bacteria: Gram<sup>-</sup> HMB-PP<sup>+</sup>, *Acinetobacter baumannii*, *Enterobacter cloacae* (two different strains tested), *Klebsiella pneumoniae* and *Pseudomonas aeruginosa*; Gram<sup>+</sup> HMB-PP<sup>+</sup>, *Mycobacterium smegmatis*; Gram<sup>-</sup> HMB-PP<sup>-</sup>, *Chryseobacterium indologenes*; and Gram<sup>+</sup> HMB-PP<sup>-</sup>, *Enterococcus faecalis*, *Listeria innocua* and *Staphylococcus aureus*; in the presence or absence of alkaline phosphatase (AP). Data shown are representative from independent experiments using 2-5 different donors.

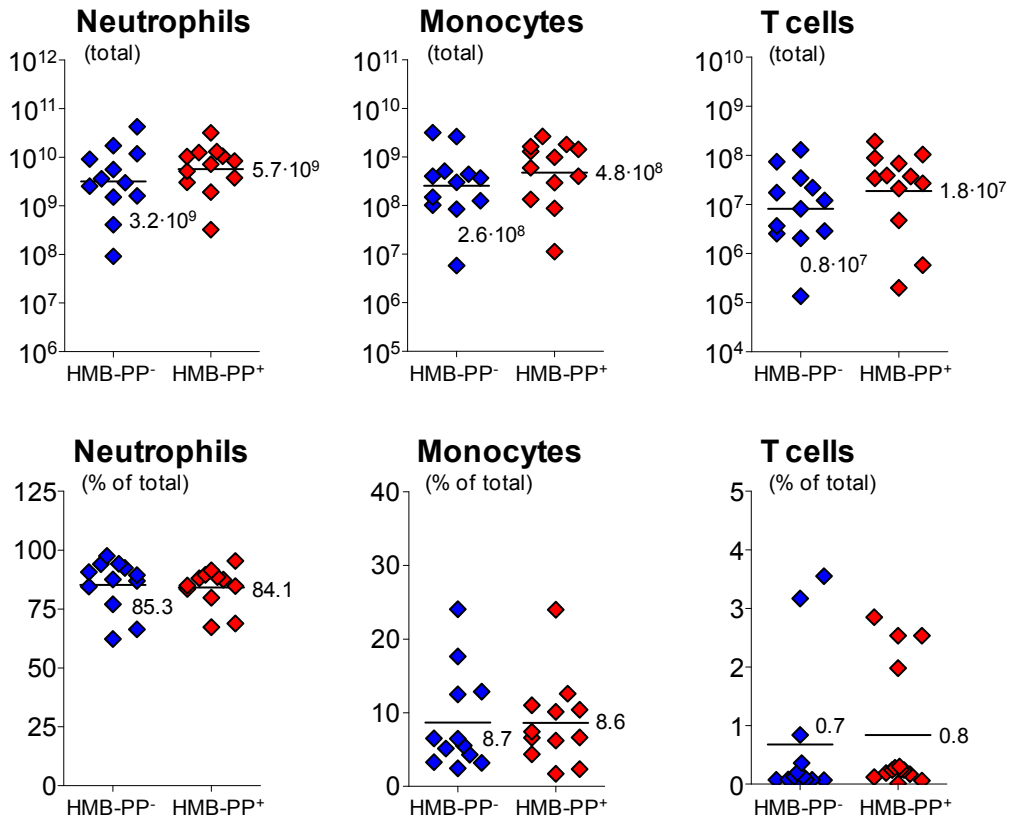

**Figure S5. Neutrophil, monocytes and T cells in acute peritonitis are not influenced by the HMB-PP status of the causative pathogen.** Total numbers and frequencies of peritoneal CD15<sup>+</sup> neutrophils, CD14<sup>+</sup> monocytes/macrophages and CD3<sup>+</sup> T cells in patients with PD-associated peritonitis on day 1 (the day of hospital admission with a cloudy effluent, *i.e.* before commencement of antibiotic therapy), depending on whether or not the causative pathogen was capable of producing HMB-PP.



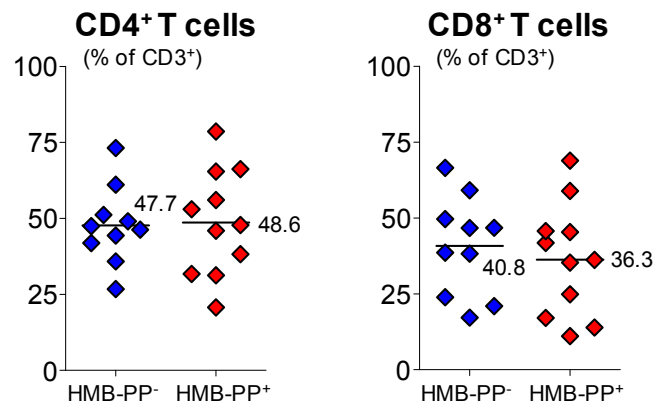

**Figure S6. CD4<sup>+</sup> and CD8<sup>+</sup> T cells in acute peritonitis are not influenced by the HMB-PP status of the causative pathogen.** Proportion of CD4<sup>+</sup> and CD8<sup>+</sup> T cells within all peritoneal CD3<sup>+</sup> T cells in patients with PD-associated peritonitis on day 1 (the day of hospital admission with a cloudy effluent, *i.e.* before commencement of antibiotic therapy), depending on whether or not the causative pathogen was capable of producing HMB-PP.

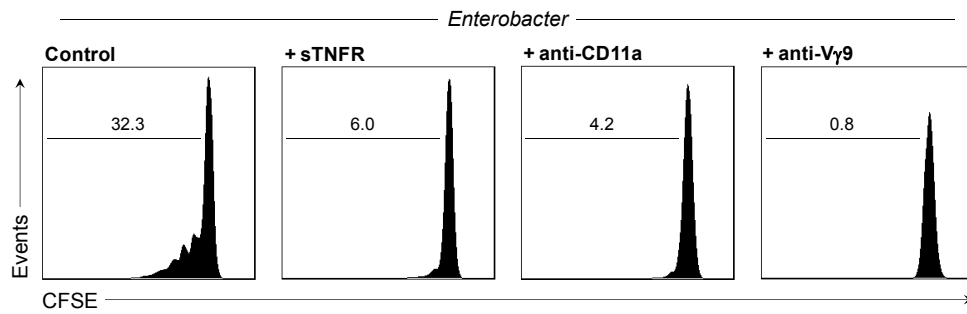

**Figure S7. The V $\gamma$ 9/V $\delta$ 2 T cells response to HMB-PP producing bacteria is TCR dependent.** Proliferation after 5 days in culture of CFSE-labeled V $\gamma$ 9/V $\delta$ 2 T cells in response to supernatants from neutrophils harboring *Enterobacter cloacae*, in the presence or absence of soluble TNF- $\alpha$  receptor (sTNFR) or antibodies against CD11a or TCR-V $\gamma$ 9. Data shown are representative of independent experiments using cells from two different donors.

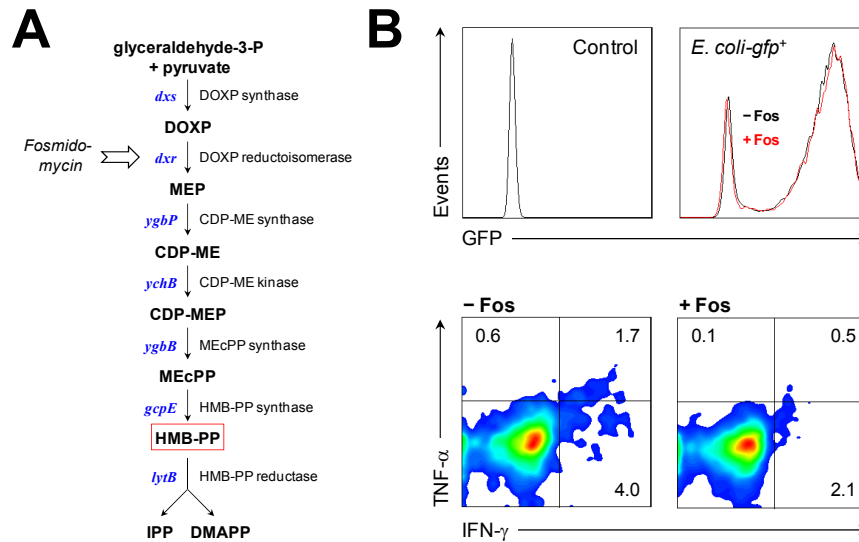

**Figure S8. Fosmidomycin abrogates HMB-PP dependent  $\gamma\delta$  T cell responses to phagocytosed bacteria but does not affect bacterial uptake by neutrophils.** (A) Overview of the non-mevalonate pathway of isoprenoid biosynthesis. The bacterial genes encoding the enzymes indicated are highlighted in blue. Fosmidomycin blocks HMB-PP production by inhibiting the second step of the pathway. DOXP, 1-deoxy-D-xylulose 5-phosphate; MEP, 2-C-methyl-D-erythritol 4-phosphate; CDP-ME, 4-diphosphocytidyl-2-C-methyl-D-erythritol; CDP-MEP, 4-diphosphocytidyl-2-C-methyl-D-erythritol 2-phosphate; MEcPP, 2-C-methyl-D-erythritol 2,4-cyclopyrophosphate; IPP, isopentenyl pyrophosphate; DMAPP, dimethylallyl pyrophosphate. (B) Phagocytosis by neutrophils of *E. coli-gfp<sup>+</sup>* that had been pre-treated or not for 1 hour with 50  $\mu\text{g/ml}$  fosmidomycin (control, neutrophils only). GFP fluorescence was determined 1 hour later. Neutrophil supernatants were collected after 5 hours and added to  $\gamma\delta$  T cell-monocyte co-cultures for 20 hours. Data shown are representative of independent experiments using cells from two different donors.
